# Supplementary material
Source: PubMed Central journal article supplement (PMC419907)
Supplement: 7600227s2.pdf [file 7600227s2.pdf]

**A**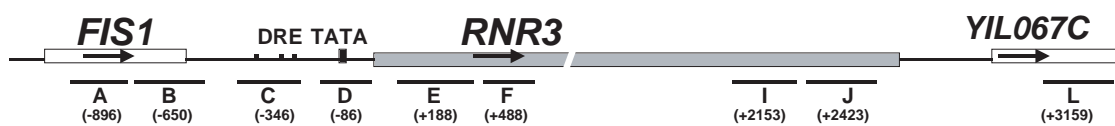**B**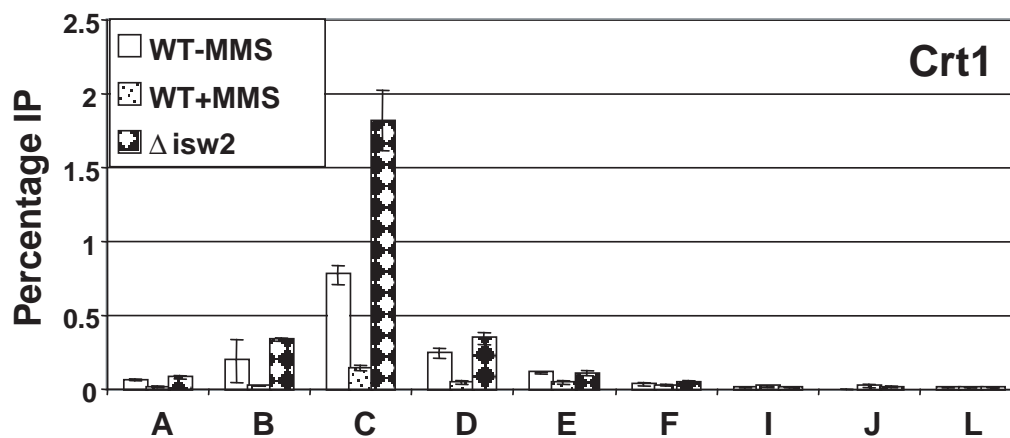

**Sup Fig.2. Increased Crt1 crosslinking to the URS of *RNR3* in  $\Delta isw2$  cells.** (A) Schematic of the location of the PCR probes across the *RNR3* locus. The numbers in parentheses indicate the base pair at the center of each PCR fragment relative to the start site of translation. (B) Summary of ChIP experiments using Crt1 polyclonal antiserum. Data are expressed as the “percentage IP” compared to the input DNA signal. See Figure 3 legend for details about the PCR primers. Note that the level of Crt1 crosslinking is reduced in MMS treated cells, as reported previously (Huang et al., 1998 and Li and Reese, 2001) and the level of crosslinking in the  $\Delta isw2$  mutant is elevated 2-2.5 fold.
