# Supplementary material
Source: PubMed Central journal article supplement (PMC419907)
Supplement: 7600227s3.pdf [file 7600227s3.pdf]

Sup Fig. 3

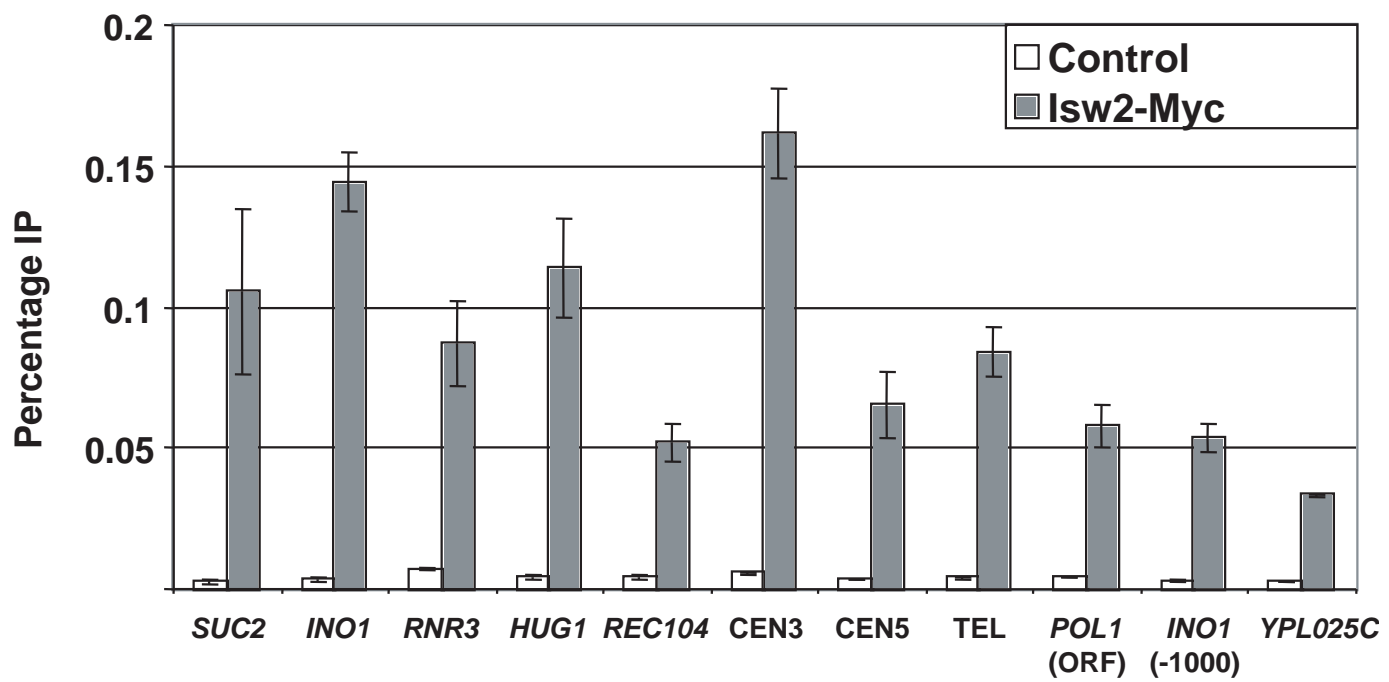

**Sup. Fig. 3. Crosslinking of Isw2-myc to various loci.** A strain with *ISW2* tagged at the C-terminus with 9-myc epitopes was used to prepare chromatin extracts, and monoclonal antiserum (9E10) to c-myc was used to immunoprecipitate Isw2p. IPs from an untagged strain were used as a background control. The PCR products are localized to the promoters of *SUC2*, *INO1*, *RNR3*, *HUG1*, and *REC104*, the centromeres on chromosome 3 and 5, telomeric region, ORF of *POL1*, upstream of *INO1*, and the *YPL025C* gene. Primer sequences are available upon request. *INO1* and *REC104* are two well characterized *ISW2*-dependent genes.
