# Supplementary material
Source: PubMed Central journal article supplement (PMC419907)
Supplement: 7600227s5.pdf [file 7600227s5.pdf]

## Sup. Table I.

### Strain list:

| Name    | Relevant genotypes                                                                                                             | Reference              |
|---------|--------------------------------------------------------------------------------------------------------------------------------|------------------------|
| BY4741  | Mat a his3- $\Delta$ 1; leu2- $\Delta$ 0; ura3- $\Delta$ 0; met15- $\Delta$ 0                                                  | Resgen                 |
| BY4705  | Mat $\alpha$ ade2 $\Delta$ ::hisG; his3- $\Delta$ 200; leu2; ura3; trp1- $\Delta$ 63; lys2; met15- $\Delta$ 0                  | Resgen                 |
| W303    | Mat a ade2-1; his3-11,15; leu2-3,112; trp1-1; ura3-1; can1-100; RAD5                                                           |                        |
| BLRY117 | Mat a sth1- $\Delta$ 3::HIS3; his3- $\Delta$ 200; ura3-52; ade2-101; lys2-801;<br>pDJ66(CEN6; ARSH4; URA3; sth1 $\Delta$ 1338) | Du et al., 1998        |
| JPY17   | Mat a ade2-1; his3-11,15; leu2-3,112; trp1-1; ura3-1; can1-100; RAD5;<br>chd1::TRP1                                            | Tsukiyama et al., 1999 |
| TTY186  | Mat $\alpha$ ade2-1; his3-11,15; leu2-3,112; trp1-1; ura3-1; can1-100; RAD5;<br>isw1::ADE2                                     | Tsukiyama et al., 1999 |
| TTY196  | Mat a ade2-1; his3-11,15; leu2-3,112; trp1-1; ura3-1; can1-100; RAD5;<br>Isw2::LEU2                                            | Tsukiyama et al., 1999 |
| YJR415  | BY4705, $\Delta$ crt1::LEU2                                                                                                    | Li and Reese 2000      |
| YJR611  | BY4741, $\Delta$ tup1::LEU2                                                                                                    | This study             |
| YJR600  | BY4741, $\Delta$ isw2::HIS3                                                                                                    | This study             |
| YJR573  | BY4705, ISW2-MYC9::URA3                                                                                                        | This study             |
| YJR586  | BY4705, ISW2-MYC9::URA3; $\Delta$ ssn6::LEU2                                                                                   | This study             |
| YJR584  | BY4705, ISW2-MYC9::URA3; $\Delta$ tup1::LEU2                                                                                   | This study             |
| WCS484  | MAT a; $\Delta$ (HHT1-HHF1) $\Delta$ (HHT2-HHF2); his3; leu2-3,112; ura3; trp1<br>pNOY436(CEN6; ARS4; TRP1; HHT2-cmycHHF2)     | W. Shen, unpublished   |
| YJR792  | WCS484, $\Delta$ isw2::KanMx                                                                                                   | This study             |
